# Supplementary material for: Carbon quantum dot coated Mn3O4 with enhanced performances for lithium-ion batteries
Source: Royal Society of Chemistry journal article supplement (doi:10.1039/c5ta03610k), 2015-01-01
Supplement: c5ta03610k1.pdf [file c5ta03610k1.pdf]

## Supporting information

### **Carbon Quantum Dots Coated $\text{Mn}_3\text{O}_4$ with Enhanced Performances for Lithium-ion Batteries**

Mingjun Jing<sup>a</sup>, Jufeng Wang<sup>b</sup>, Hongshuai Hou<sup>a</sup>, Yingchang Yang<sup>a</sup>, Yan Zhang<sup>a</sup>,  
Chengchi Pan<sup>a</sup>, Jun Chen<sup>a</sup>, Yirong Zhu<sup>a</sup>, Xiaobo Ji<sup>a\*</sup>

<sup>a</sup>College of Chemistry and Chemical Engineering, Central South University, Changsha 410083, China.

<sup>b</sup>Zhengzhou Zhiqin Science and Technology Co., Ltd., Zhengzhou 450002, China.

\* Address correspondence to xji@csu.edu.cn.

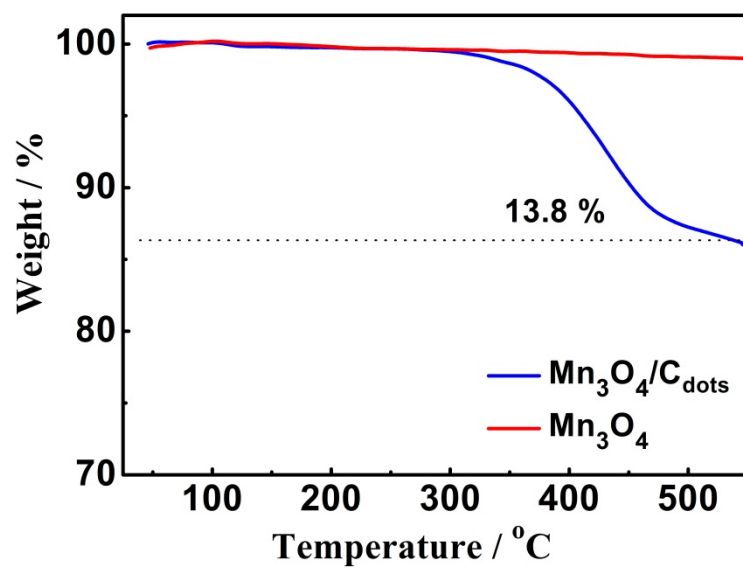

**Fig. S1** TGA curves of  $\text{Mn}_3\text{O}_4$  and  $\text{Mn}_3\text{O}_4/\text{C}_{\text{dots}}$  samples.

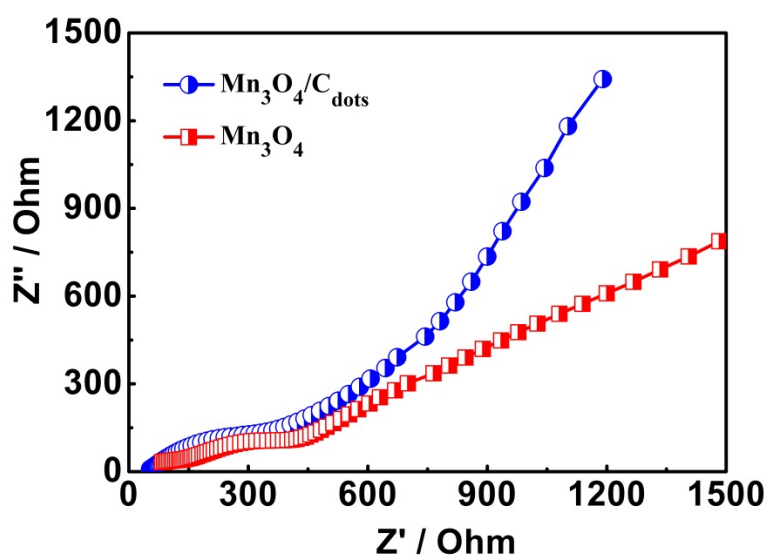

**Fig. S2** EIS curves of  $\text{Mn}_3\text{O}_4$  and  $\text{Mn}_3\text{O}_4/\text{C}_{\text{dots}}$  after 100 charge-discharge cycles.
